# Supplementary material for: Hydrogen production via water splitting using noble gas plasma-collisional splitting (NgPCS)
Source: Royal Society of Chemistry journal article supplement (doi:10.1039/d4su00697f), 2025-01-01
Supplement: d4su00697f1.pdf [file d4su00697f1.pdf]

## Supporting Information

### Hydrogen Production via Water Splitting Using Noble gas Plasma-Collisional Splitting (NgPCS)

Souma Yoshida<sup>†</sup>, Yoshiyuki Takatsuji<sup>†</sup>, and Tetsuya Haruyama<sup>†\*</sup>

<sup>†</sup>*Division of Functional Interface Engineering, Department of Biological Functions and Engineering, Kyushu Institute of Technology. Kitakyushu Science and Research Park, Kitakyushu, Fukuoka 808-0196, Japan*

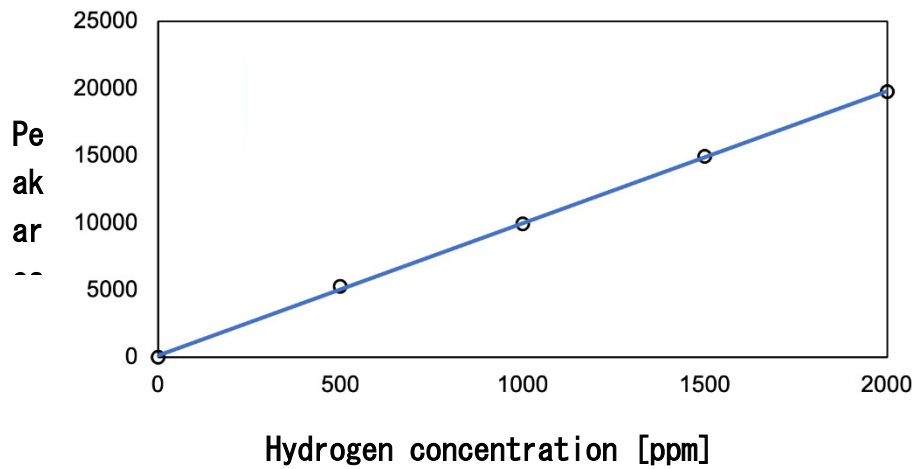

**Figure S1.** Calibration curve for hydrogen gas obtained using a standard sample in TCD-gas chromatography analysis.

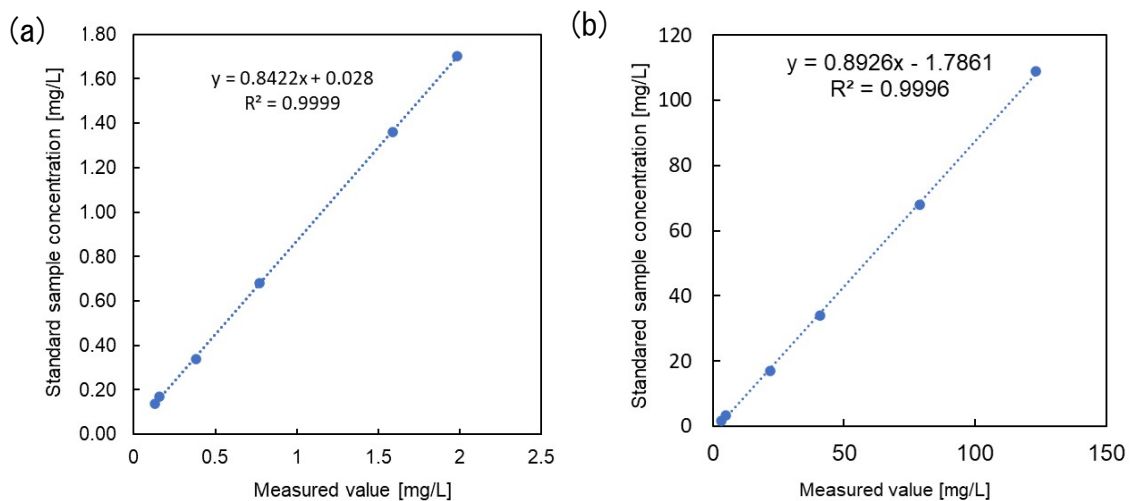

**Figure S2.** Calibration curve for hydrogen peroxide using a standard sample in a Digital Water Analyzer.

**Standard chemicals:**

- Standard hydrogen gas (99.99% purity) was obtained from GL Science Co., Ltd.
- Hydrogen peroxide standard solution (H<sub>2</sub>O<sub>2</sub> (aq.): 30%) was purchased from Wako Chemical Co., Ltd.

Table S1 Spectroscopic data by the Ar plasma employed in this study.

| Ion  | Wavelength<br>[nm] | Upper Energy level<br>$E_j$ [eV] | Transition probability<br>$A \times 10^6$ [s <sup>-1</sup> ] | Statistical<br>weight $g$ |
|------|--------------------|----------------------------------|--------------------------------------------------------------|---------------------------|
| Ar-I | 687.13             | 14.71371                         | 2.78                                                         | 3                         |
| Ar-I | 706.72             | 13.30477                         | 3.80                                                         | 5                         |
| Ar-I | 714.70             | 13.28518                         | 0.63                                                         | 3                         |
| Ar-I | 731.17             | 14.85121                         | 1.70                                                         | 3                         |
| Ar-I | 738.40             | 13.30477                         | 8.50                                                         | 5                         |
| Ar-I | 750.39             | 13.48247                         | 45.0                                                         | 1                         |
| Ar-I | 763.51             | 13.1743                          | 24.5                                                         | 5                         |
| Ar-I | 784.94             | 14.85121                         | 0.35                                                         | 3                         |
| Ar-I | 805.33             | 14.71371                         | 0.86                                                         | 3                         |
